# Supplementary material
Source: PubMed Central journal article supplement (PMC2962585)
Supplement: NIHMS212424-supplement-Supplement1.pdf [file NIHMS212424-supplement-Supplement1.pdf]

## Supplementary Appendix

This appendix has been provided by the authors to give readers additional information about their work.

Supplement to: Richter HE, Albo ME, Zyczynski HM, et al. Retropubic versus transobturator midurethral slings for stress incontinence. *N Engl J Med* 2010;362:2066-76. DOI: 10.1056/NEJMoa0912658.

## Table of Contents

|                                                                            |      |
|----------------------------------------------------------------------------|------|
| Urinary Incontinence Treatment Network (UITN) Steering Committee . . . . . | 2-3  |
| Web Table 1 . . . . .                                                      | 4-6  |
| Web Table 2 . . . . .                                                      | 7-11 |
| Web Table 3 . . . . .                                                      | 12   |
| Web Figure Legend. . . . .                                                 | 13   |
| Figure 1 . . . . .                                                         | 14   |

---

---

**URINARY INCONTINENCE TREATMENT NETWORK (UITN) STEERING COMMITTEE**

Elizabeth A. Gormley, Chair (Dartmouth Hitchcock Medical Center, Lebanon, NH); Larry Sirls, MD, Salil Khandwala, MD (William Beaumont Hospital, Royal Oak, MI and Oakwood Hospital, Dearborn, MI; U01 DK58231); Linda Brubaker, MD, Kimberly Kenton, MD (Loyola University Medical Center, Maywood, IL; U01 DK60379); Holly E. Richter, PhD, MD, L. Keith Lloyd, MD (University of Alabama at Birmingham, Birmingham, AL; U01 DK60380); Michael Albo, MD, Charles Nager, MD (University of California, San Diego, CA; U01 DK60401); Toby C. Chai, MD, Harry W. Johnson, MD (University of Maryland, Baltimore, MD; U01 DK60397); Halina M. Zyczynski, MD, Wendy Leng, MD (University of Pittsburgh, Pittsburgh, PA; U01 DK 58225); Philippe Zimmern, MD, Gary Lemack, MD (University of Texas Southwestern, Dallas, TX; U01 DK60395); Stephen Kraus, MD, Thomas Rozanski, MD (University of Texas Health Sciences Center, San Antonio, TX; U01 DK58234); Peggy Norton, MD, Ingrid Nygaard, MD (University of Utah, Salt Lake City, UT; U01 DK60393); Sharon Tennstedt, PhD, Anne Stoddard, ScD (New England Research Institutes, Watertown, MA; U01 DK58229); Debuene Chang, MD, Marva Moxey-Mims, MD, Rebekah Rasooly, MD (National Institute of Diabetes & Digestive & Kidney Diseases).

**CO-INVESTIGATORS**

Amy Arisco, MD; Jan Baker, APRN; Diane Borello-France, PT, PhD; Kathryn L. Burgio, PhD; Ananias Diokno, MD; Melissa Fischer MD; MaryPat Fitzgerald, MD; Chiara Ghetti, MD; Patricia S. Goode, MD; Robert L. Holley, MD; Margie Kahn, MD; Jerry Lowder, MD; Karl Luber, MD; Emily Luckacz, MD; Alayne Markland, DO, MSc; Shawn Menefee, MD; Pamela Moalli, MD; Elizabeth Mueller, MD; Pradeep Nagaraju MD; Kenneth Peters, MD; Elizabeth Sagan, MD; Joseph Schaffer, MD; Amanda Simsiman, MD; Robert Starr, MD; Gary Sutkin, MD; R. Edward Varner, MD.

**STUDY COORDINATORS**

Laura Burr, RN; JoAnn Columbo, BS, CCRC; Tamara Dickinson, RN, CURN, CCCN, BCIA-PMDB; Rosanna Dinh, RN, CCRC; Judy Gruss, RN; Alice Howell, RN, BSN, CCRC; Chaandini Jayachandran, MSc; Kathy Jesse, RN; D. Lynn Kalinoski, PhD; Barbara Leemon, RN; Kristen Mangus; Karen Mislanovich, RN; Elva Kelly Moore, RN; Caren Prather, RN; Sylvia Sluder, CCRP; Mary Tulke, RN; Robin Willingham, RN, BSN; Kimberly Woodson, RN, MPH; Gisselle Zazueta-Damian.

**DATA COORDINATING CENTER:**

Kimberly J. Dandreo, MSc; Liyuan Huang, MS; Rose Kowalski, MA; Heather Litman, PhD; Marina Mihova, MHA; Anne Stoddard, ScD (Co-PI); Kerry Tanwar, BA; Sharon Tennstedt, PhD (PI); Yan Xu, MS.

**DATA SAFETY AND MONITORING BOARD**

J. Quentin Clemens MD, (Chair) Northwestern University Medical School, Chicago IL; Paul Abrams MD, Bristol Urological Institute, Bristol UK; Diedre Bland MD, Blue Ridge Medical Associates, Winston Salem NC; Timothy B. Boone, MD, The Methodist Hospital, Baylor College of Medicine, Houston, TX; John Connett PhD, University of Minnesota, Minneapolis MN; Dee Fenner MD, University of Michigan, Ann Arbor MI; William Henderson PhD, University of Colorado, Aurora CO; Sheryl Kelsey PhD, University of

Pittsburgh, Pittsburgh PA; Deborah J. Lightner, MD, Mayo Clinic, Rochester, MN; Deborah Myers MD, Brown University School of Medicine, Providence RI; Bassem Wadie MBBCh, MSc, MD, Mansoura Urology and Nephrology Center, Mansoura, Egypt; J. Christian Winters, MD, Louisiana State University Health Sciences Center, New Orleans, LA

**Web Table 1.** Other Demographic, Anthropometric, Clinical, Urodynamic and Surgical Characteristics of the Study Population\*

| <b>Characteristic</b>                                     | <b>Retropubic<br/>(n=298)</b> | <b>Transobturator<br/>(n=299)</b> |
|-----------------------------------------------------------|-------------------------------|-----------------------------------|
| <b>Demographic Characteristics</b>                        |                               |                                   |
| Marital Status                                            |                               |                                   |
| Married/Living as Married                                 | 203 (68)                      | 209 (70)                          |
| Not Married                                               | 95 (32)                       | 90 (30)                           |
| Education                                                 |                               |                                   |
| High School or less                                       | 89 (30)                       | 95 (32)                           |
| Some post-high school training                            | 116 (39)                      | 101 (34)                          |
| Baccalaureate or more                                     | 93 (31)                       | 103 (34)                          |
| Smoking Status                                            |                               |                                   |
| Never smoked                                              | 158 (53)                      | 161 (54)                          |
| Former smoker                                             | 96 (32)                       | 102 (34)                          |
| Current smoker                                            | 44 (15)                       | 36 (12)                           |
| Menopause and hormone replacement                         |                               |                                   |
| Postmenopausal and current hormone replacement therapy    | 81 (27)                       | 90 (30)                           |
| Postmenopausal and no current hormone replacement therapy | 128 (43)                      | 116 (39)                          |
| Pre-menopausal                                            | 88 (30)                       | 92 (31)                           |
| Pelvic Organ Prolapse                                     |                               |                                   |
| Quantification Stage †                                    |                               |                                   |

|              |          |          |
|--------------|----------|----------|
| Stage 0/I    | 130 (44) | 137 (46) |
| Stage II     | 144 (48) | 138 (46) |
| Stage III/IV | 24 (8)   | 24 (8)   |

### **Urodynamic Measures‡**

---

Leakage when determining Valsalva leak

point pressure (VLPP)

|                        |          |          |
|------------------------|----------|----------|
| Leak with Valsalva     | 206 (71) | 212 (71) |
| Leak with cough at MCC | 40 (14)  | 47 (16)  |
| Did not leak           | 45 (15)  | 39 (13)  |

### **Surgical Characteristics**

---

#### **Surgeries**

|                                                          |         |         |
|----------------------------------------------------------|---------|---------|
| Concomitant Surgery §                                    | 73 (25) | 78 (26) |
| Vault Suspension                                         | 21 (7)  | 18 (6)  |
| Anterior vaginal wall repair                             | 25 (8)  | 28 (9)  |
| Posterior repair/perineorrhaphy                          | 35 (12) | 36 (12) |
| Vaginal hysterectomy +/- bilateral salpingo-oophorectomy | 25 (8)  | 21 (7)  |
| Bilateral salpingo-oophorectomy                          | 8 (3)   | 6 (2)   |
| Anal sphincteroplasty                                    | 1 (0.3) | 2 (0.7) |
| Colpocleisis                                             | 2 (1)   | 6 (2)   |

|                           |        |        |
|---------------------------|--------|--------|
| Enterocoele repair        | 3 (1)  | 4 (1)  |
| Other concomitant surgery | 12 (4) | 15 (5) |

---

\* Plus-minus values are means  $\pm$  SD unless otherwise indicated. Percentages may not total 100 because of rounding. Stand alone values with parentheses are n (%).

†Prolapse staging is based on the methods of the Pelvic Organ Prolapse Quantification system.<sup>1</sup>

‡Valsalva leak point pressure (VLPP) refers to the vesical pressure at the time of leakage.

§Concomitant surgery includes vault suspension (uterosacral ligament vault suspension, sacrospinous ligament suspension, iliococcygeus vault suspension), anterior vaginal wall repair (anterior colporrhaphy, vaginal paravaginal repair), posterior repair/perineorrhaphy (standard posterior colporrhaphy, defect-directed posterior repair, posterior repair with allograft or autograft), vaginal hysterectomy with or without bilateral salpingo oophorectomy, bilateral salpingo oophorectomy, anal sphincteroplasty, colpocleisis, enterocele repair and other. A person could have more than one concomitant surgery, so categories do not sum to the total who had concomitant surgery.

Reference:

1. Bump RC, Mattiasson A, Bø K, et al. The standardization of terminology of female pelvic organ prolapse and pelvic floor dysfunction. Am J Obstet Gynecol 1996;175:10-7.

**Web Table 2.\*** Adverse Events<sup>a</sup> by Treatment Group, Severity<sup>b</sup>, and System

|                                           | Treatment             |                           |
|-------------------------------------------|-----------------------|---------------------------|
|                                           | Retropubic<br>(N=298) | Transobturator<br>(N=299) |
| System Events                             | Number of<br>events   | Number of<br>events       |
| <b>Adverse Events (AE), (Grades I-II)</b> |                       |                           |
| Genitourinary                             | 46                    | 27                        |
| Cystitis – culture proven                 | 23                    | 15                        |
| Cystitis – empirically treated            | 15                    | 8                         |
| Recurrent cystitis <sup>c</sup>           | 8                     | 4                         |
| Vascular/hematologic                      | 20                    | 7                         |
| Intraoperative bleeding <sup>d</sup>      | 14                    | 7                         |
| Postoperative bleeding                    | 6                     | 0                         |
| Neurologic symptoms <sup>e</sup>          | 15                    | 31                        |
| Numbness                                  | 8                     | 9                         |
| Suprapubic                                | 2                     | 1                         |
| Groin                                     | 1                     | 2                         |
| Vulva                                     | 2                     | 0                         |



|                                                                                                                | Treatment             |                           |
|----------------------------------------------------------------------------------------------------------------|-----------------------|---------------------------|
|                                                                                                                | Retropubic<br>(N=298) | Transobturator<br>(N=299) |
| Upper leg                                                                                                      | 0                     | 5                         |
| Lower leg                                                                                                      | 3                     | 1                         |
| Weakness                                                                                                       | 7                     | 22                        |
| Upper leg                                                                                                      | 4                     | 20                        |
| Lower leg                                                                                                      | 3                     | 2                         |
| Voiding dysfunction                                                                                            | 16                    | 5                         |
| Managed with catheter at $\geq 6$<br>weeks postoperatively<br>(not medicine, behavioral<br>or neuromodulation) | 11                    | 2                         |
| Managed with medical therapy<br>at $\geq 6$ weeks<br>postoperatively                                           | 2                     | 1                         |
| Managed with behavioral or<br>neuromodulation (with or<br>without catheter use)                                | 3                     | 2                         |
| Pain <sup>f</sup> per patient self-report $\geq 6$                                                             | 7                     | 7                         |

|                      | Treatment             |                           |
|----------------------|-----------------------|---------------------------|
|                      | Retropubic<br>(N=298) | Transobturator<br>(N=299) |
| weeks                |                       |                           |
| Suprapubic and Groin | 3                     | 2                         |
| Suprapubic only      | 3                     | 3                         |
| Other                | 1                     | 2                         |
| Other <sup>g</sup>   | 7                     | 6                         |

\* This is not a complete list of adverse events; this expands on adverse events presented in the main text.

Note: One subject randomized to the retropubic procedure received a transobturator sling and had a culture proven cystitis; one subject randomized to the transobturator procedure received the retropubic procedure and had no SAE's or AE's.

<sup>a</sup> Adverse event (AE) defined as a deviation from the normal intra- or post-operative course (Grades I and II). A single patient can have multiple entries.

<sup>b</sup> Severity grade determined by a slightly modified version of the Dindo<sup>1</sup> classification system, which is based on the level of therapy required to treat an event. Serious Adverse Event (SAE) defined as  $\geq$  Grade III-V; no grade IV or V events occurred in either group.

I – No pharmacologic, surgical, or radiologic intervention (allowed therapeutic regimens include antiemetics, antipyretics, analgesics, diuretics, electrolytes, and physiotherapy).

II – Required pharmacologic treatment with drugs other than such allowed for grade I complications (antibiotics, blood transfusions and total parenteral nutrition are included).

III – Required surgical, endoscopic or radiologic intervention.

IV – Life-threatening complication requiring intensive care management.

V – Death.

<sup>c</sup> Recurrent cystitis defined as presumed UTI with treatment,  $\geq 3$  in 1 year after 6 week visit.

<sup>d</sup> Estimated blood loss (EBL)  $> 100$  cc due to sling placement or EBL for total case  $\geq 1000$  cc.

<sup>e</sup> Neurologic symptoms are defined by self report on standardized form of new paresthesias or alteration in motor function that developed between surgery and the 6 week visit. Symptoms were not assessed after the 6 week visit. The location of numbness or weakness was ascertained by the patient marking a body map. The one neurologic SAE was numbness occurring in the patient's upper leg. Neurologic AEs were listed by location.

<sup>f</sup> Pain defined as self report at or beyond 6 weeks post surgery by the following questions:

1. Patient answers “yes” to the introductory question “Have you had any pain within the last 24 hours as a result of your incontinence operation?” and
2. Patient answers any of the first three McCarthy<sup>2</sup> pain questions at a level 75mm or greater on the visual analog scale (150mm total length). and

3. Patient answers the bother question on the McCarthy visual analog scale at a level 75mm or greater.

<sup>g</sup> Other adverse events include: granulation tissue, anxiety, thrush, wound edge separation, minor wound, medication reaction and skin irritation.

References:

1. Dindo D, Demartines N, Clavien PA. Classification of surgical complications: a new proposal with evaluation in a cohort of 6336 patients and results of a survey. *Ann Surg* 2004;240:205-13.
2. McCarthy M Jr, Jonasson O, Chang CH, et al. Assessment of patient functional status after surgery. *J Am Coll Surg* 2005;201:171-8. [Erratum, *J Am Coll Surg* 2005;201;825.]

**Web Table 3. Quality of Life Outcomes**

|                         | Treatment             |                           | p Value <sup>a</sup> |
|-------------------------|-----------------------|---------------------------|----------------------|
|                         | Retropubic<br>(N=298) | Transobturator<br>(N=299) |                      |
| ‡Change UDI total       | 106.8(48.0)           | 110.5(51.2)               | 0.40                 |
| ‡Change UDI stress      | 61.6 (27.2)           | 61.8(27.7)                | 0.95                 |
| ‡Change UDI irritative  | 30.2 (24.7)           | 33.6 (25.6)               | 0.12                 |
| ‡Change UDI Obstructive | 15.0 (17.9)           | 15.1(16.2)                | 0.95                 |
| ‡Change IIQ total       | 111.6 (93.2)          | 118.7 (96.6)              | 0.40                 |

<sup>a</sup> P-values are from least squares models predicting change in scores from treatment group.

‡ Mean (SD) of scores on the Urogenital Distress Inventory range from 0 to 300, with higher scores indicating greater distress. Scores on the Incontinence Impact Questionnaire range from 0 to 400, with higher scores indicating greater impact.<sup>1</sup> The scores are changes from baseline to the 12 month visit (baseline – 12 months).

Reference:

1. Shumaker SA, Wyman JF, Uebersax JS, McClish D, Fantl JA. Health-related quality of life measures for women with urinary incontinence: the Incontinence Impact Questionnaire and the Urogenital Distress Inventory. Qual Life Res 1994;3:291-306.

**Web Figure 1.** Retropubic (green) and Transobturator (blue) Midurethral Slings

By Permission, Jasmine Tan, MD.

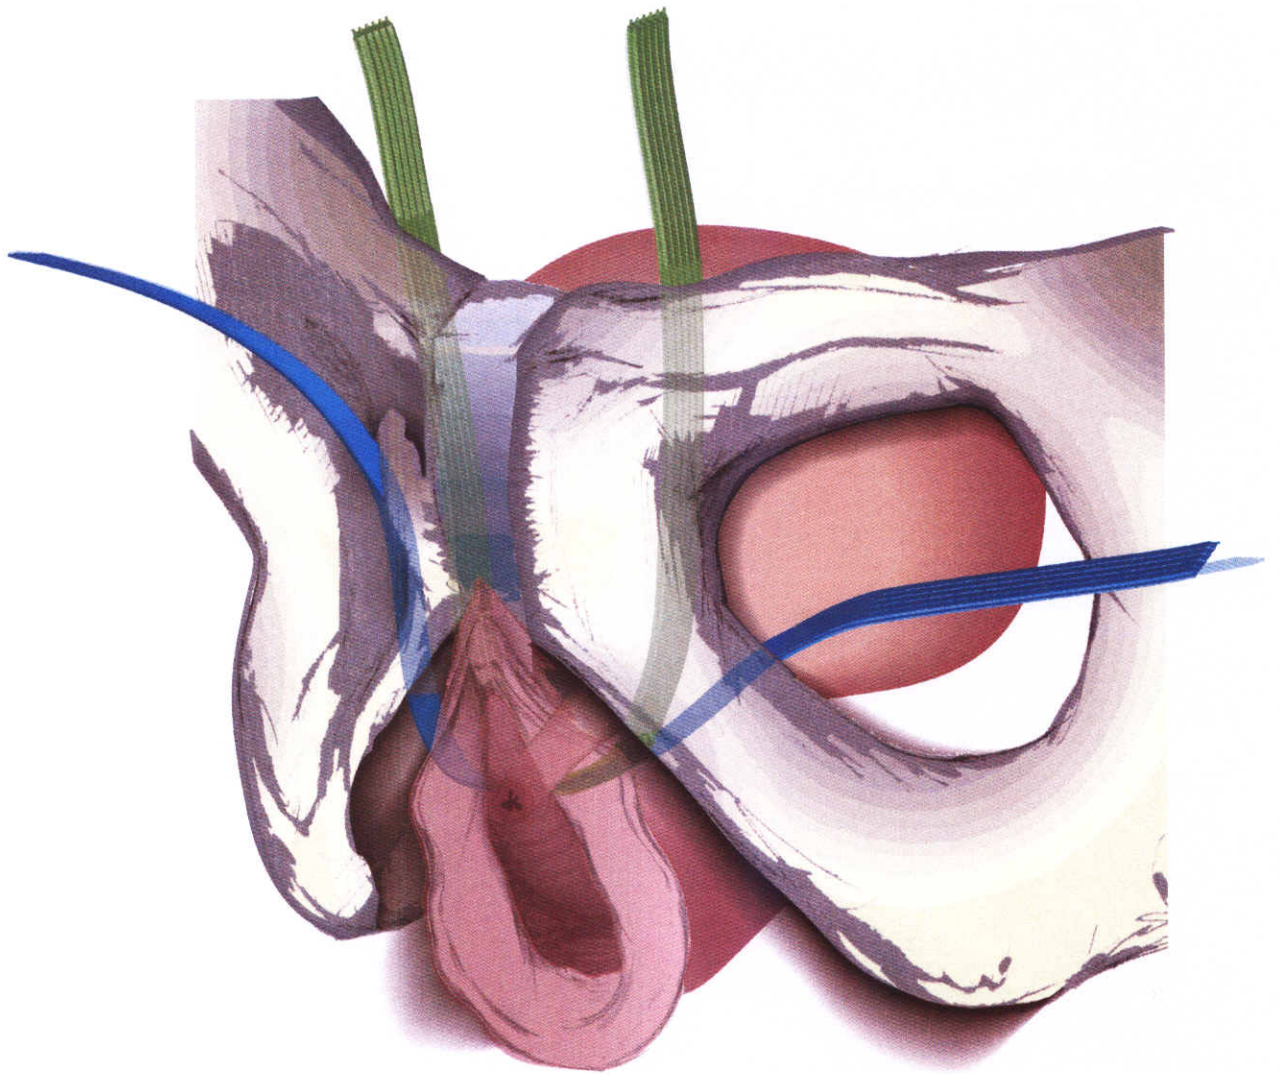

Figure 1.
